# Supplementary material for: Tapping into non-English-language science for the conservation of global biodiversity
Source: PubMed Central journal article supplement (PMC8496809; doi:10.1371/journal.pbio.3001296), 2021-10-07
Supplement: pbio.3001296.s020.pdf [file pbio.3001296.s020.pdf]

#### خلاصه

این فرض رایج که همه اطلاعات علمی مهم به زبان انگلیسی قابل دستیابی است، زمینه‌ساز عدم استفاده از دانش موجود به سایر زبان‌ها در رشته‌های مختلف شده است. این در حالیست که دانش منتشر شده به زبان‌های غیر انگلیسی اطلاعات خاص و ارزشمندی را به همراه دارد. این اطلاعات به خصوص در رشته‌هایی که شواهد محدود و کمیاب است و در مسائل فوری که یافتن راه حل آن‌ها نیازمند ترکیب شواهد موجود است می‌تواند بسیار ارزشمند باشد. با این وجود، سهم دانش منتشر شده به زبان‌های غیر انگلیسی در جوامع علمی و کاربرد علم به ندرت تعیین می‌شود. مطالعه حاضر نشان می‌دهد که دانش موجود به زبان‌های غیر انگلیسی شواهد مهمی برای حفاظت از تنوع زیستی جهانی ارائه می‌دهند. با غربالگری 419,679 مقاله معتبر به 16 زبان، ما 1234 مطالعه غیر انگلیسی زبان را شناسایی کردیم که شواهدی در مورد اثربخشی مداخلات حفاظت از تنوع زیستی ارائه کرده‌اند. در مقایسه، تعداد مطالعات انگلیسی زبانی که با همین معیارها شناسایی شد 4412 مورد بود. تعداد مطالعات غیر انگلیسی زبان در شش زبان از 12 زبانی که تعداد کافی مطالعات مرتبط در آن‌ها وجود داشت با سرعت فزاینده‌ای در حال افزایش است. با وجود اینکه مطالعات غیر انگلیسی زبان در مجموع بر اساس طرح آزمایش‌های ضعیف‌تری انجام شده‌اند، استفاده از آن‌ها می‌تواند پوشش جغرافیایی (یعنی تعداد سلول‌های شبکه 2 در 2 درجه دارای مطالعات مرتبط) شواهد انگلیسی زبان را 12-25 درصد، به ویژه در مناطق با تنوع زیستی بالا، و پوشش تاکسونومیک (به عنوان مثال، تعداد گونه‌های تحت پوشش مطالعات مرتبط) را 5-32 درصد افزایش دهد. نتایج ما نشان می‌دهد که ترکیب مطالعات غیر انگلیسی زبان برای غلبه بر فقدان گسترده شواهد محلی و موردی اهمیت زیادی داشته و می‌تواند نقشی کلیدی در تسهیل حفاظت مبتنی بر شواهد در سراسر جهان ایفا کند. ما جوامع علمی رشته‌های مختلف را تشویق می‌کنیم که به طور دقیق پتانسیل‌های بکار گرفته نشده از دانش منتشر شده به زبان‌های غیر انگلیسی را در تصمیمات مربوط به حل چالش‌های جهانی مورد ارزیابی مجدد قرار دهند.
